# Supplementary material for: Scattering effect of the high-index dielectric nanospheres for high performance hydrogenated amorphous silicon thin-film solar cells
Source: PubMed Central journal article supplement (PMC4960586; doi:10.1038/srep30503), 2016-07-26
Supplement: srep30503-s1.pdf [file srep30503-s1.pdf]

# Scattering effect of the high-index dielectric nanospheres for high performance hydrogenated amorphous silicon thin-film solar cells

Zhenhai Yang<sup>1</sup>, Pingqi Gao<sup>1,\*</sup>, Cheng Zhang<sup>2</sup>, Xiaofeng Li<sup>2</sup>, and Jichun Ye<sup>1,\*</sup>

<sup>1</sup>Ningbo Institute of Material Technology and Engineering, Chinese Academy of Sciences, Ningbo 315201, China

<sup>2</sup>College of Physics, Optoelectronics and Energy & Collaborative Innovation Center of Suzhou Nano Science and Technology, Soochow University, Suzhou 215006, China

Corresponding author: [gaopingqi@nimte.ac.cn](mailto:gaopingqi@nimte.ac.cn) (PG); [jichun.ye@nimte.ac.cn](mailto:jichun.ye@nimte.ac.cn) (JY)

## Supplement information

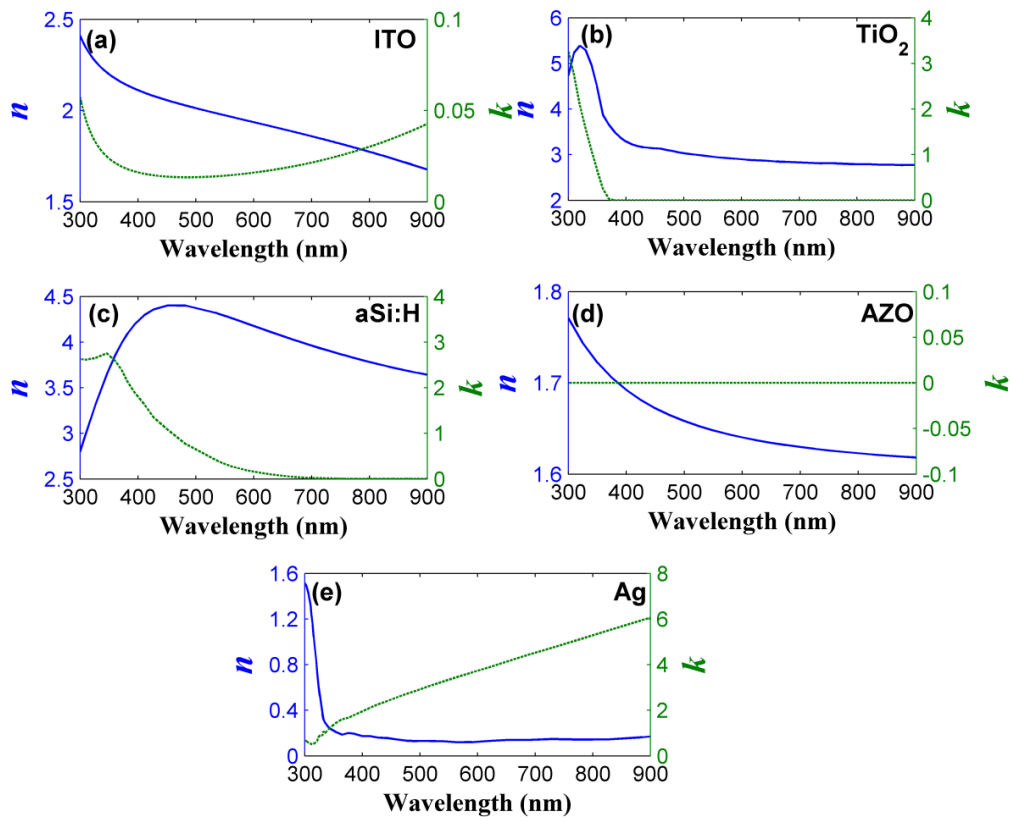

**Fig. S1.** The refractive index  $n$  and extinction coefficient  $k$  for (a) ITO, (b)  $\text{TiO}_2$ , (c) a-Si:H, (d) AZO, and (e) Ag, respectively.

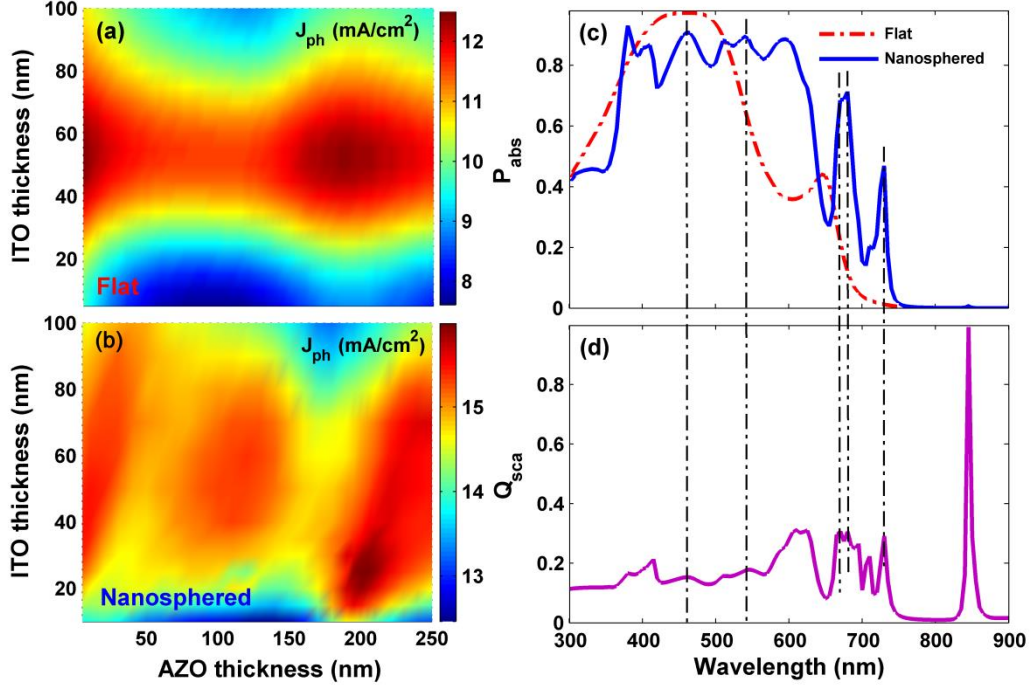

**Fig. S2.** (a)/(b) photocurrent density ( $J_{ph}$ ) versus thickness of ITO and AZO for the flat/nanosphered TFSCs, (c) absorption spectra ( $P_{abs}$ ) under flat and nanosphered designs, and (d) normalized scattering spectrum ( $Q_{sca}$ ) under TiO<sub>2</sub>-nanosphered system.

In this study, on the basic of electromagnetic field distributions, we calculated the scattering efficiency ( $Q_{sca}$ ) by integrating energy flux densities under the entire surface area of nanosphere. In detail, it can be expressed as the following formulas:

$$Q_{sca} = \iint P_{sca} ds \quad (1)$$

$$P_{sca} = n_x \cdot P_{scax} + n_y \cdot P_{sca y} + n_z \cdot P_{sca z} \quad (2)$$

$$P_{sca x} = \frac{1}{2} \text{Re}(\mathbf{E}_y \times \mathbf{H}_z - \mathbf{E}_z \times \mathbf{H}_y) \quad (3)$$

$$P_{sca y} = \frac{1}{2} \text{Re}(\mathbf{E}_z \times \mathbf{H}_x - \mathbf{E}_x \times \mathbf{H}_z) \quad (4)$$

$$P_{sca z} = \frac{1}{2} \text{Re}(\mathbf{E}_x \times \mathbf{H}_y - \mathbf{E}_y \times \mathbf{H}_x) \quad (5)$$

where  $n_x$ ,  $n_y$  and  $n_z$  are the refractive indexes,  $P_{sca x}$ ,  $P_{sca y}$  and  $P_{sca z}$  are the energy flux densities,  $E_x$ ,  $E_y$  and  $E_z$  ( $H_x$ ,  $H_y$  and  $H_z$ ) are the electric (magnetic) fields along  $x$ ,  $y$  and  $z$  directions, respectively.  $S$  is the surface area of nanosphere. To well address this problem, we presented the  $P_{sca z}$  values with the space angle (in the  $yz$  plane) as an example (as shown in Fig. S3).

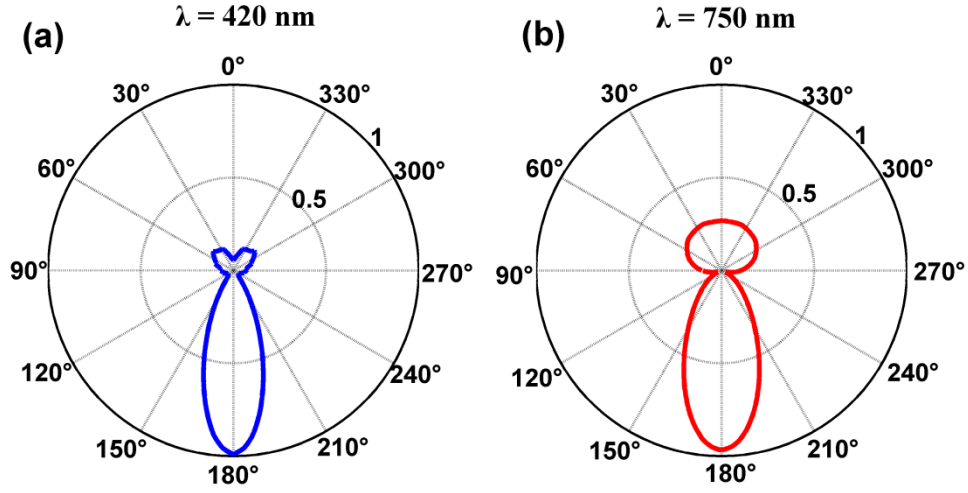

**Fig. S3.**  $P_{\text{scaz}}$  as a function of the angle under (a)  $\lambda = 420$  nm, and (b) 750 nm, respectively.

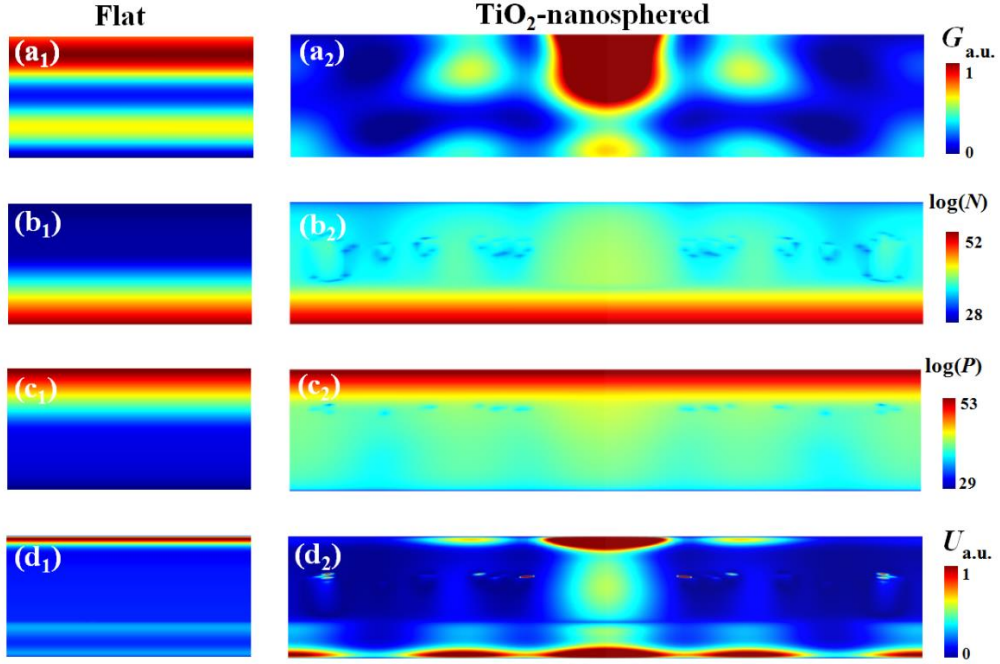

**Fig. S4.** The spatial distributions of the stabilized carrier generation (a<sub>1</sub>)/(a<sub>2</sub>), electron concentration (b<sub>1</sub>)/(b<sub>2</sub>), hole concentration (c<sub>1</sub>)/(c<sub>2</sub>), and bulk recombination (d<sub>1</sub>)/(d<sub>2</sub>) inside the a-Si:H layer at the wavelength of 500nm for flat/TiO<sub>2</sub> nanosphered TFSCs, respectively.

The three dimensional (3D) transport equations for electrons and holes in this study can be expressed as:

$$\nabla(-D_n \nabla n + n \mu_n \nabla \Phi) = G - U \quad (6)$$

$$\nabla(-D_p \nabla p - p \mu_p \nabla \Phi) = G - U \quad (7)$$

where  $n$  ( $p$ ) is the electron (hole) concentration,  $D_n = \mu_n K_B T / q$  ( $D_p = \mu_p K_B T / q$ ) is the electron (hole) diffusion coefficient,  $\mu_n$  ( $\mu_p$ ) is the electron (hole) mobility,  $K_B$  is Boltzmann's constant,  $T$  is the operating temperature,  $q$  is the electron charge,  $\Phi$  is the electrostatic potential. The electrostatic potential  $\Phi$  is determined by the charge profiles in the device according to the Poisson's equation:

$$\nabla^2 \Phi = \frac{q}{\varepsilon} (n - p - N_d + N_a) \quad (8)$$

where  $\varepsilon$  is the material permittivity,  $N_d$  ( $N_a$ ) is the concentration of the ionized donor (acceptor). The wavelength-dependent photocarrier generation rate  $G(\lambda)$  can be expressed as following formula:

$$G(\lambda) = \frac{\varepsilon''(\lambda) |E(\lambda)|^2}{2\hbar} \Phi_{AM1.5}(\lambda) d\lambda \quad (9)$$

where  $\varepsilon''$  is the imaginary part of the permittivity,  $E$  is the electric field, and  $\hbar$  is the reduced Planck constant.  $U$  includes contributions from Shockley-Read-Hall, radiative, and Auger recombinations:

$$U_{\text{bulk}} = U_{\text{SRH}} + U_{\text{Aug}} + U_{\text{Rad}} \quad (10)$$

$$U_{\text{SRH}} = \frac{np - n_i^2}{\tau_n(p + n_i) + \tau_p(n + n_i)} \quad (11)$$

$$U_{\text{Aug}} = (C_n n + C_p p)(np - n_i^2) \quad (12)$$

$$U_{\text{Rad}} = B_{\text{rad}}(np - n_i^2) \quad (13)$$

where  $\tau_n$  ( $\tau_p$ ) is the electron (hole) lifetime,  $n_i$  is the intrinsic carrier concentration,  $B_{\text{rad}}$  is the coefficient of bimolecular radiative recombination, and  $C_n$  ( $C_p$ ) the electron (hole) Auger coefficient. The short-current density ( $J_{\text{sc}}$ ) is calculated by integrating the  $EQE$  spectrum of the cell under the standard AM1.5G illumination.

$$J_{\text{sc}} = \int_{300\text{nm}}^{850\text{nm}} \frac{e\lambda}{hc} \Phi_{AM1.5}(\lambda) EQE(\lambda) d\lambda \quad (14)$$

where  $e$  is the unit charge,  $h$  the Plank constant,  $c$  the speed of light in vacuum, and  $\Phi_{AM1.5}$  the solar spectral irradiance under air mass 1.5.

Table. S1 Parameters used in this simulation

| Variables        | Values                     | Unit                    |
|------------------|----------------------------|-------------------------|
| $N_a$            | $1.3 \times 10^{17}$       | $\text{cm}^{-3}$        |
| $N_d$            | $4.3 \times 10^{16}$       | $\text{cm}^{-3}$        |
| $T$              | 300                        | K                       |
| $\tau_n$         | 1.7 – 2                    | $\mu\text{s}$           |
| $\tau_p$         | 0.34 – 2                   | $\mu\text{s}$           |
| $\mu_n$          | $4.6 \times 10^{-2} - 1$   | $\text{cm}^2/\text{Vs}$ |
| $\mu_p$          | $9.2 \times 10^{-3} - 0.5$ | $\text{cm}^2/\text{Vs}$ |
| $\varepsilon$    | 11.7                       |                         |
| $C_n$            | $1 \times 10^{-30}$        | $\text{cm}^6/\text{s}$  |
| $C_p$            | $1 \times 10^{-30}$        | $\text{cm}^6/\text{s}$  |
| $B_{\text{rad}}$ | $7.2 \times 10^{-10}$      | $\text{cm}^3/\text{s}$  |
| $n_i$            | $5 \times 10^7$            | $\text{cm}^{-3}$        |
